# Supplementary material for: Drosophila Kdm4 demethylases in histone H3 lysine 9 demethylation and ecdysteroid signaling
Source: PubMed Central journal article supplement — Sci Rep. 2013 Oct 8;3:2894. doi: 10.1038/srep02894 (PMC3792421; doi:10.1038/srep02894), 2013-10-08
Supplement: srep02894-s1.pdf [file srep02894-s1.pdf]

***Drosophila* Kdm4 demethylases in histone H3 lysine 9 demethylation and ecdysteroid signaling**

**Amy Tsurumi<sup>1, a</sup> Pranabanada Dutta,<sup>2</sup> Shian-Jang Yan,<sup>2</sup> Robin Sheng,<sup>2</sup> and Willis X. Li<sup>1, 2</sup>**

<sup>1</sup>*Department of Biomedical Genetics, University of Rochester Medical Center, Rochester, New York 14642*

<sup>2</sup>*Department of Medicine, University of California San Diego, La Jolla, CA 92093*

<sup>a</sup>*current address: Department of Surgery, Massachusetts General Hospital, Boston, MA 02114*

## Supplementary Table and Figures

### Supplementary Table

**Table S1. Viability of *Kdm4A, B* double homozygous Larvae**

| Time (AEL) | Genotype                                                                              |                                                                                                                                             |               |
|------------|---------------------------------------------------------------------------------------|---------------------------------------------------------------------------------------------------------------------------------------------|---------------|
|            | <i>Kdm4A</i> <sup>KG04636</sup> ,<br><i>Kdm4B</i> <sup>EY10737</sup> / <i>CyO GFP</i> | <i>Kdm4A</i> <sup>KG04636</sup> ,<br><i>Kdm4A</i> <sup>KG04636</sup> , <i>Kdm4B</i> <sup>EY10737</sup> /<br><i>Kdm4B</i> <sup>EY10737</sup> | Viability (%) |
|            | Observed (n)                                                                          | Observed (n)                                                                                                                                |               |
| 47 – 48 h  | 131                                                                                   | 64                                                                                                                                          | 97.7          |
| 49 – 50 h  | 98                                                                                    | 22                                                                                                                                          | 44.9          |
| 51 – 52 h  | 258                                                                                   | 26                                                                                                                                          | 20.2          |
| 53 – 54 h  | 243                                                                                   | 4                                                                                                                                           | 3.3           |

*Kdm4A*<sup>KG04636</sup>, *Kdm4B*<sup>EY10737</sup>/*CyO GFP* flies were allowed to lay eggs at 25°C for one hour, and then adult flies were removed and eggs were allowed to hatch. Crawling larvae were counted at indicated time intervals and their genotypes were deduced by the presence or absence of GFP fluorescence, which was detected using an epifluorescent microscope. n denotes the number of live larvae. AEL: after egg laying. Percent viability = observed/expected x100. If viable, the expected number of *Kdm4A, B* double homozygous larvae should be 1/2 of their GFP+ siblings (homozygotes for the *CyO* chromosome die as embryos), based on the Mendelian ratio.

## Supplementary Figures

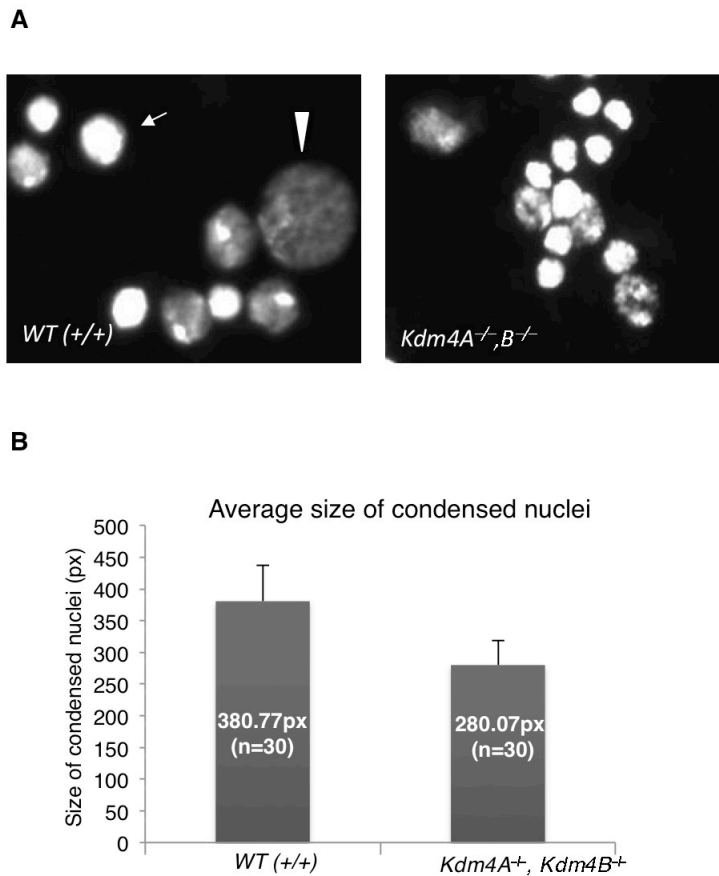

### Figure S1. Loss of Kdm4 leads to higher nuclear compaction

(A) Wild-type control and *Kdm4A*<sup>-/-</sup>, *Kdm4B*<sup>-/-</sup> homozygous double mutant second instar larval brains were dissected and placed on a glass slide in mounting media containing the DNA dye DAPI. Wild-type control and mutant brains were squashed under the same cover slip to allow comparison of nuclear compaction. Nuclei from the brain squash exhibit different size and compaction, as revealed by DAPI stain. The arrow points to a condensed nucleus. The arrowhead points to a less condensed nucleus, with a larger size and diffuse DAPI stain.

(B) Pixel size was used to quantify differences in condensed nuclear size. Note that *Kdm4A*<sup>KG</sup>, *B*<sup>EY</sup> homozygous double mutant brains exhibit smaller nuclear size and thus are more condensed.

Supplementary Figure 2

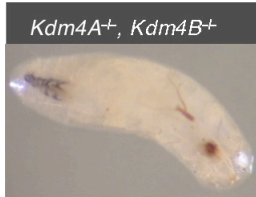

**Figure S2.  $Kdm4A^{-/-}$ ,  $Kdm4B^{-/-}$  homozygous larvae show brown patches**

A second instar  $Kdm4A^{-/-}$ ,  $Kdm4B^{-/-}$  homozygous larva with brown patches is shown. 28% of  $Kdm4A^{-/-}$ ,  $Kdm4B^{-/-}$  second instar larvae show this phenotype (n=27/95).

Supplementary Figure 3

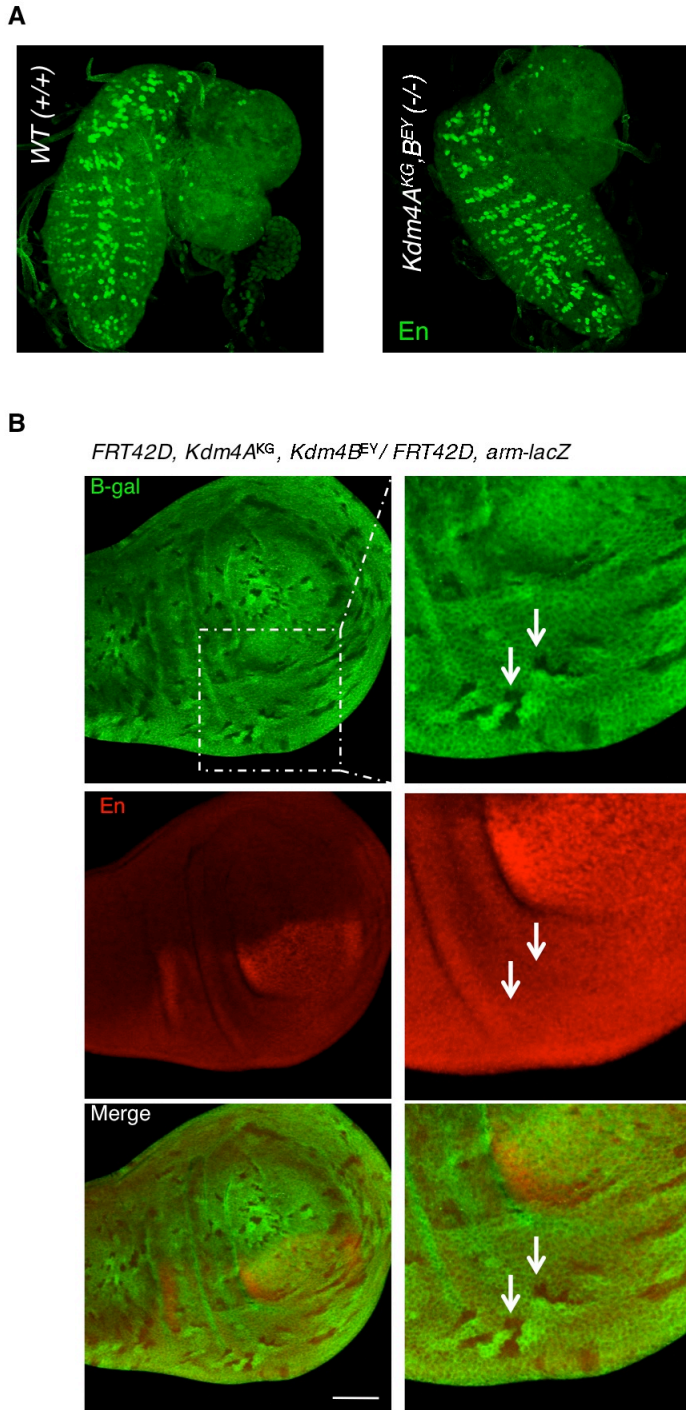

**Figure S3. Loss of Kdm4 does not alter En expression**

(A) Second instar larval brains from *WT* or *Kdm4A<sup>KG</sup>, B<sup>EY</sup>* homozygous double mutant animals were isolated and immunostained with anti-En antibody. (B) *Kdm4A<sup>KG</sup>, B<sup>EY</sup>* homozygous double mutant clones were induced in the second instar, and larval wing discs were dissected in the third instar. Anti-En and anti- $\beta$ -GAL immunostaining were performed.  $\beta$ -GAL negative regions mark mutant clones, while cells with both signals are wildtype. Higher magnification images of the boxed region in the left panels are shown to the right. White arrows point to two *Kdm4A<sup>-/-</sup>, Kdm4B<sup>-/-</sup>* mutant clones (marked by lack of green). Note that En signals (red) in the clones were not altered. The scale bars represent 150 $\mu$ .

Figure S4

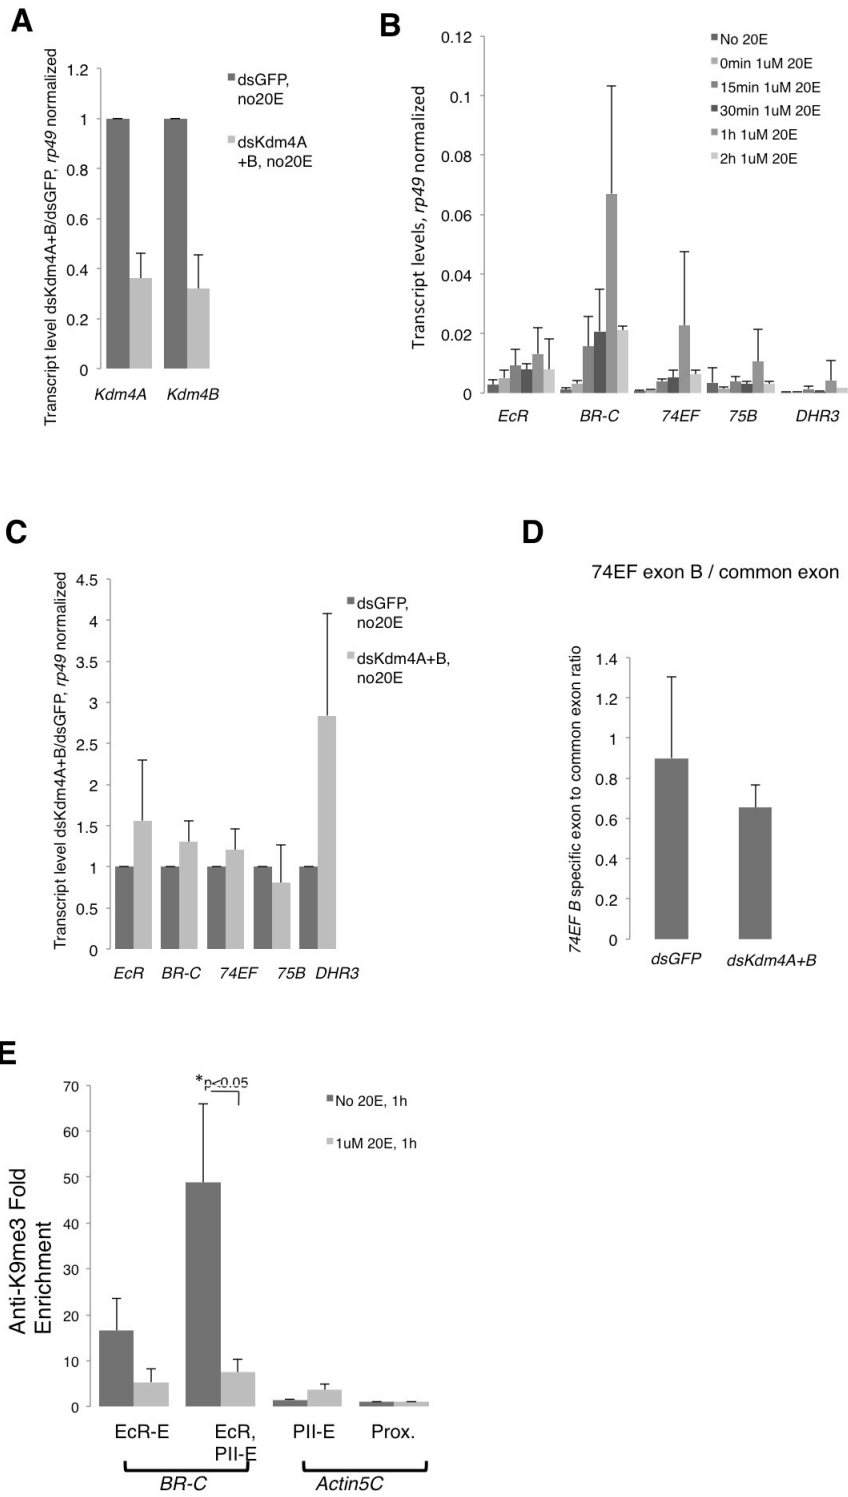

**Figure S4. Kdm4 and expression of the Ecdysone pathway components in S2 cells**

**(A)** S2 cells were treated with 20 $\mu$ g of dsRNA directed against *Kdm4A* and *Kdm4B*, or *GFP*. Quantitative RT-PCR was conducted in triplicate to detect levels of *Kdm4A* and *Kdm4B* transcripts, which were normalized to *rp49* transcript levels.

**(B)** The ecdysteroid pathway was induced in S2 cells by adding 1 $\mu$ M of the 20E hormone. Cells were harvested at the indicated time points and subjected to quantitative RT-PCR in triplicates, with primer pairs specific for *EcR*, *BR-C*, *74EF*, *75B* and *DHR3*, respectively. Peak activation was detected at the one-hour time point.

**(C)** S2 cells were treated with *Kdm4A* and *Kdm4B* dsRNA, or *GFP* control dsRNA. *EcR*, *BR-C*, *74EF*, *75B* and *DHR3* transcript levels were measured by quantitative RT-PCR in triplicate, with normalization to *rp49*, prior to 20E induction to determine changes in basal levels upon depletion of both *Kdm4A* and *Kdm4B*. Error bars represent standard deviations.

**(D)** S2 cells treated with dsRNA directed against *Kdm4A* and *Kdm4B*, or with control dsRNA against *GFP* were harvested one hour after induction with 1 $\mu$ M 20E. The ratio between splice form specific to commonly expressed *74EF* exon was determined by quantitative-PCR analysis. Error bars represent standard deviation.

**(E)** S2 cells treated with 1 $\mu$ M of 20E for 1 hour, were harvested and subjected to ChIP analysis with anti-H3K9me3 antibody in triplicates. The Fold Enrichment method was used for calculation, normalized to primer pairs amplifying the *actin5C* proximal promoter region. Error bars represent standard error.

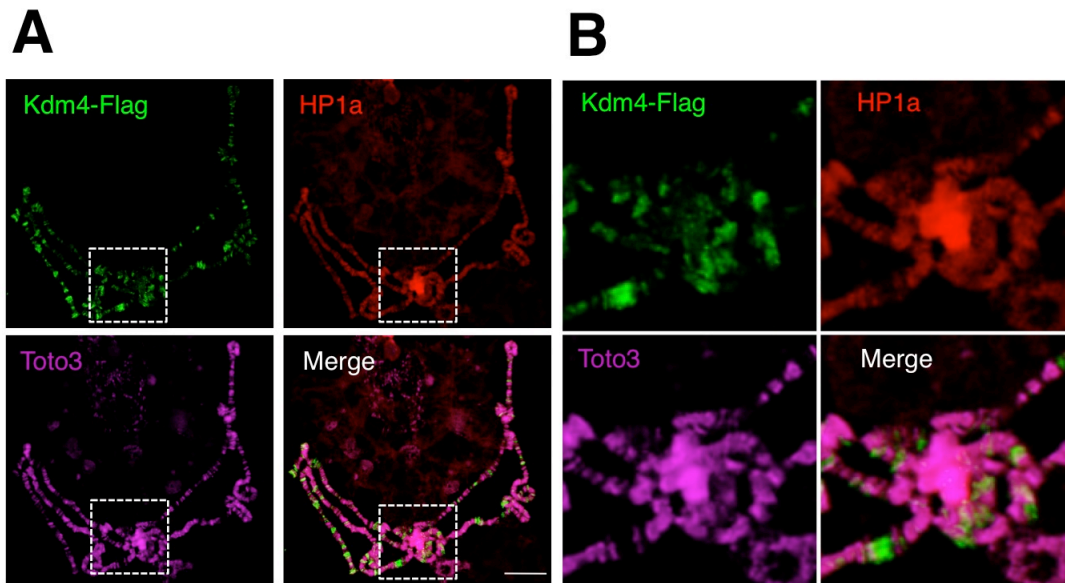

**Figure S5. Distribution of Kdm4A and HP1a on polytene chromosomes**

The *Sgs-GAL4* driver was used to express Flag-tagged Kdm4A and third instar larval polytene chromosomes were prepared. Immunostaining was performed with anti-Flag and anti-HP1a antibodies, and with Toto-3 to reveal DNA. The scale bar represents 150  $\mu$ .



**A**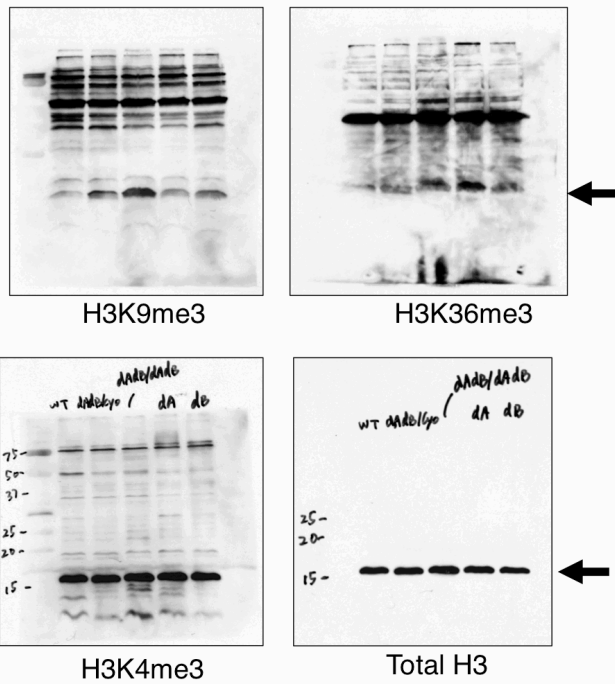**B**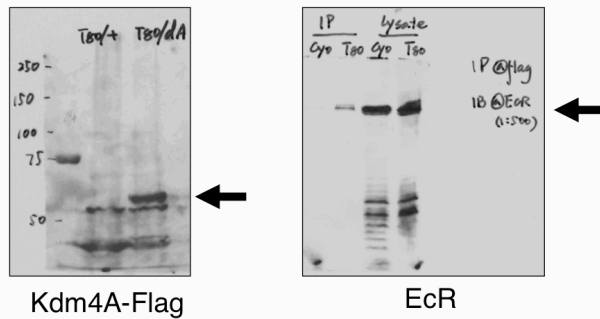**Figure S6. Full-length gel images**

Antibodies used for blotting are indicated at the bottom of gel images. Arrows point to specific bands. Other bands are non-specific bands due to cross-reactions of the antibodies.

**(A)** Full-length Western blot gel images of the cropped bands shown in Figure 1C. **(B)** Full-length images of cropped bands shown in Figure 4B.
